# Supplementary material
Source: publisher site journal article supplement (https://www.dovepress.com/article/450959)
Supplement: Supplementary file 1 [file get_supplementary_file.php]

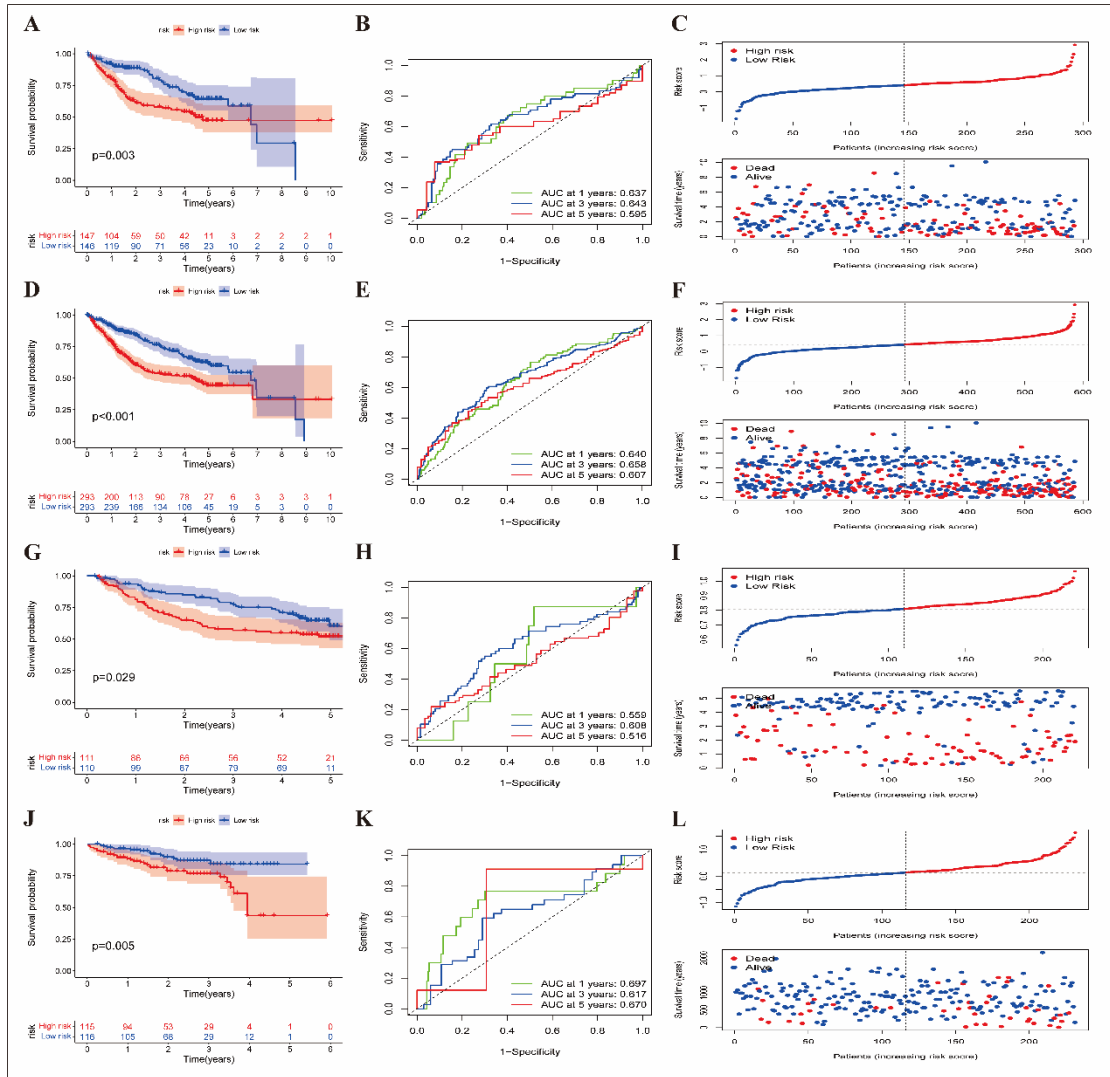

**Figure S2 Internal and external validation of CCRs-related gene signature.** Kaplan-Meier curves: (A) the test set (set2); (D) Merged set (set3); (G) GSE14520 set (set4); (J) ICGC set (set5). ROC curve: (B) the test set (set2); (E) Merged set (set3); (H) GSE14520 set (set4); (K) ICGC set (set5). Risk score and survival status distribution: (C) in the test set (set2); (F) Merged set (set3); (I) GSE14520 set (set4); (L) ICGC set (set5).

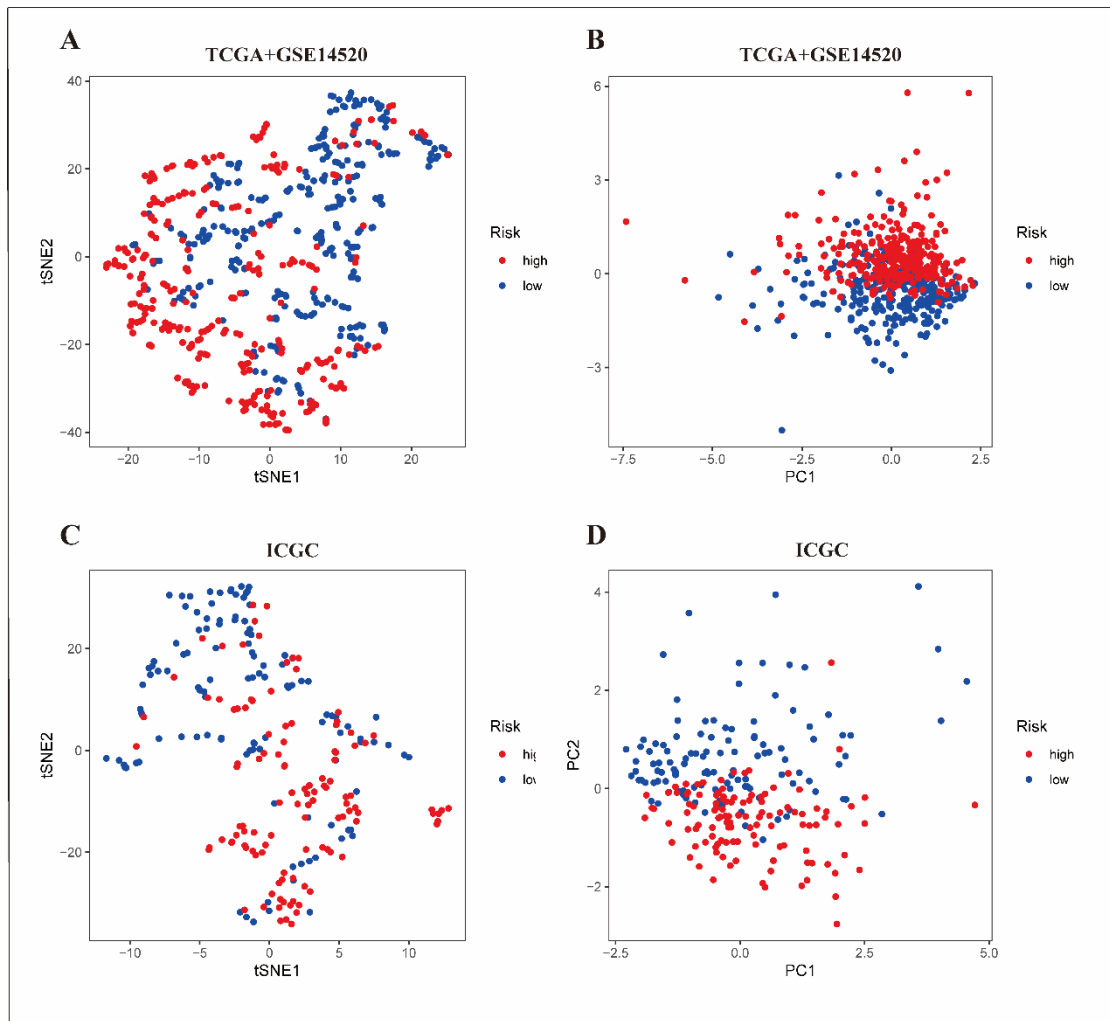

**Figure S3 t-SNE and PCA downscaling. (A, B) t-SNE and PCA in the merged set(set3). (C, D) t-SNE and PCA in the ICGC set(set5).**

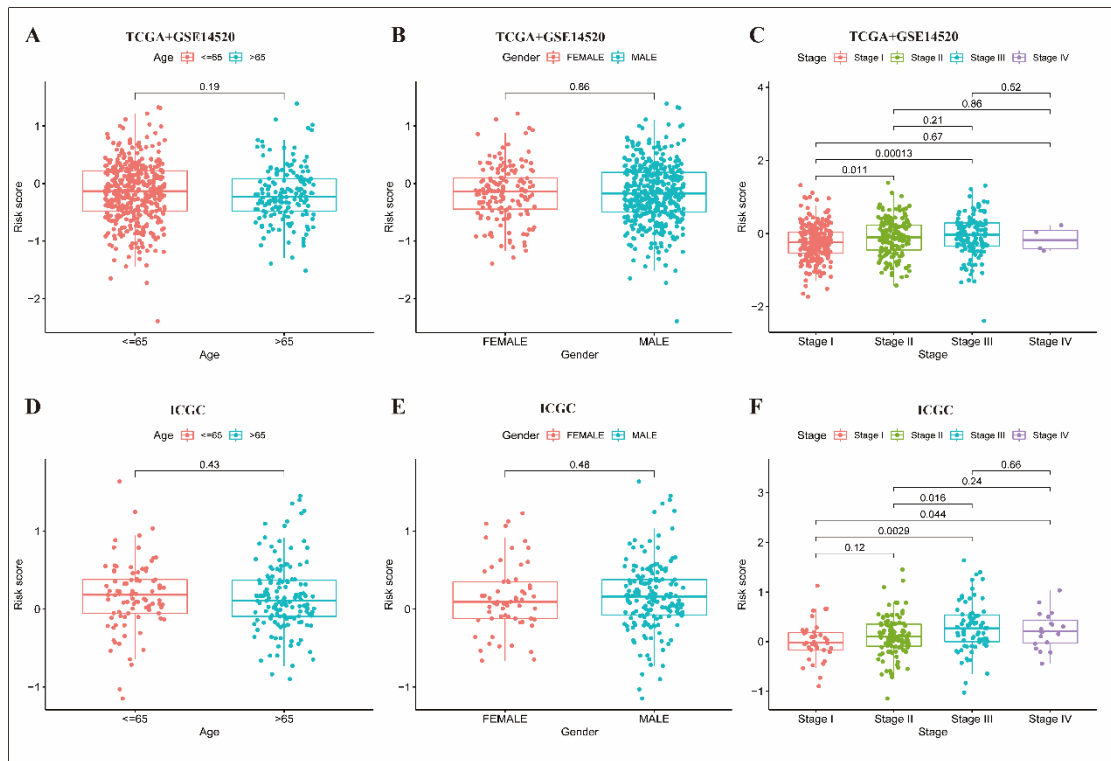

**Figure S4 Differences in risk scores between different clinical features.**

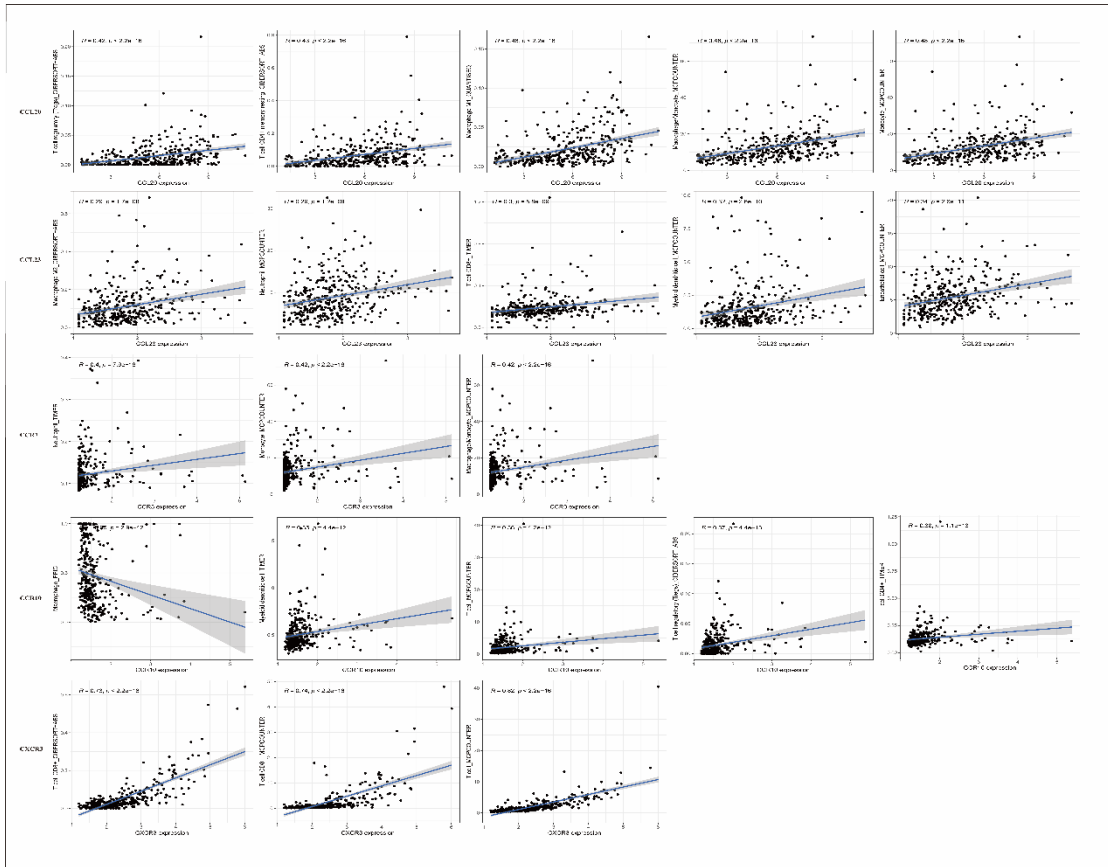

**Figure S5 Immune cells in association with CCR9-related signature genes expression.**

## 1 Supplementary Tables

**Table S1 Chemokine and Chemokine Receptors related gene**

| <b>CC</b> | <b>CXC</b> | <b>XC</b> | <b>CX3C</b> | <b>CCR</b> | <b>CXCR</b> | <b>XCR</b> | <b>CX3CR</b> |
|-----------|------------|-----------|-------------|------------|-------------|------------|--------------|
| CCL1      | CXCL1      | XCL1      | CX3CL1      | CCR1       | CXCR1       | XCR1       | CX3CR1       |
| CCL2      | CXCL2      | XCL2      |             | CCR2       | CXCR2       |            |              |
| CCL3      | CXCL3      |           |             | CCR3       | CXCR3       |            |              |
| CCL3L1    | PF4        |           |             | CCR4       | CXCR4       |            |              |
| CCL4      | PF4V1      |           |             | CCR5       | CXCR5       |            |              |
| CCL4L1    | CXCL5      |           |             | CCR6       | CXCR6       |            |              |
| CCL5      | CXCL6      |           |             | CCR7       |             |            |              |
| CCL7      | PPBP       |           |             | CCR8       |             |            |              |
| CCL8      | CXCL8      |           |             | CCR9       |             |            |              |
| CCL11     | CXCL9      |           |             | CCR10      |             |            |              |
| CCL13     | CXCL10     |           |             | ACKR4      |             |            |              |
| CCL14     | CXCL11     |           |             |            |             |            |              |
| CCL15     | CXCL12     |           |             |            |             |            |              |
| CCL16     | CXCL13     |           |             |            |             |            |              |
| CCL17     | CXCL14     |           |             |            |             |            |              |
| CCL18     | CXCL16     |           |             |            |             |            |              |
| CCL19     | CXCL17     |           |             |            |             |            |              |
| CCL20     |            |           |             |            |             |            |              |
| CCL21     |            |           |             |            |             |            |              |
| CCL22     |            |           |             |            |             |            |              |
| CCL23     |            |           |             |            |             |            |              |
| CCL24     |            |           |             |            |             |            |              |
| CCL25     |            |           |             |            |             |            |              |
| CCL26     |            |           |             |            |             |            |              |
| CCL27     |            |           |             |            |             |            |              |
| CCL28     |            |           |             |            |             |            |              |

**Table S2 Difference analysis between normal and tumor groups of LIHC**

| Gene   | conMean   | treatMean   | logFC        | pValue      | FDR         |
|--------|-----------|-------------|--------------|-------------|-------------|
| CCL8   | 1.811408  | 3.960043048 | 1.128404579  | 9.59E-05    | 0.000161831 |
| CCL13  | 0.266178  | 1.719228075 | 2.691297707  | 6.30E-07    | 1.44E-06    |
| CCL15  | 2.723552  | 8.65130615  | 1.667428551  | 2.39E-12    | 1.28E-11    |
| CCL20  | 17.66611  | 75.65670856 | 2.098483614  | 3.53E-08    | 1.08E-07    |
| CCL23  | 5.26949   | 1.12050107  | -2.233519314 | 9.83E-23    | 1.41E-21    |
| CCL25  | 0.421096  | 69.64127406 | 7.369649615  | 3.77E-11    | 1.80E-10    |
| CCL26  | 0.116978  | 1.829557754 | 3.967185825  | 6.87E-10    | 2.27E-09    |
| CCL28  | 1.136524  | 4.642807487 | 2.030369311  | 0.000216234 | 0.000344373 |
| PPBP   | 0.932604  | 0.355307487 | -1.39219653  | 8.77E-18    | 9.42E-17    |
| CXCL9  | 18.377714 | 39.53501337 | 1.105173591  | 0.018280911 | 0.023820581 |
| CXCL12 | 80.955124 | 21.41802086 | -1.918297225 | 3.00E-23    | 6.44E-22    |
| CXCL14 | 39.738406 | 6.842997326 | -2.537833715 | 2.82E-26    | 1.21E-24    |
| CXCL17 | 0.182366  | 5.589944385 | 4.937925243  | 1.89E-07    | 5.42E-07    |
| CCR3   | 0.019066  | 0.472138235 | 4.630135215  | 7.68E-06    | 1.50E-05    |
| CCR6   | 0.014262  | 0.030172727 | 1.081068797  | 0.007454411 | 0.010339989 |
| CCR8   | 0.068456  | 0.292470321 | 2.09504133   | 6.36E-07    | 1.44E-06    |
| CCR10  | 0.101882  | 0.489760428 | 2.265177024  | 1.50E-12    | 9.20E-12    |
| CXCR1  | 1.016872  | 0.402110695 | -1.338473476 | 1.14E-13    | 8.20E-13    |
| CXCR2  | 0.75702   | 0.308872727 | -1.293318926 | 6.90E-14    | 5.94E-13    |
| CXCR3  | 1.25699   | 3.129562834 | 1.31598797   | 6.04E-06    | 1.30E-05    |

**Table S3 Univariate cox regression for CCRs-related genes**

| Gene  | HR        | HR.95L      | HR.95H     | pValue      |
|-------|-----------|-------------|------------|-------------|
| CCL20 | 1.1172623 | 1.050608305 | 1.18814511 | 0.000410834 |
| CCL23 | 0.6665701 | 0.48294389  | 0.92001526 | 0.01362472  |
| CCL25 | 0.8826192 | 0.803773778 | 0.96919895 | 0.008916455 |
| CXCL9 | 0.927391  | 0.861990224 | 0.9977538  | 0.04335942  |
| CCR3  | 1.2151969 | 1.016547468 | 1.45266547 | 0.03234043  |
| CCR6  | 1.3400956 | 1.038686487 | 1.72896842 | 0.024325225 |
| CCR10 | 1.3076637 | 1.021596588 | 1.67383517 | 0.033204995 |
| CXCR3 | 1.1327998 | 1.058929358 | 1.21182342 | 0.000289884 |

**Table S4 The primer sequences of signature genes**

| Gene  | Forward primer         | Reverse primer       |
|-------|------------------------|----------------------|
| CCL20 | GCAAGCAACTTTGACTGCTG   | TTGGATTTGCGCACACAGAC |
| CCL23 | AGATGACCTTCTCTCATGCTGC | CTCTCCAGGAGTGAACACGG |
| CCR3  | ATGCTGGTGACAGAGGTGAT   | AGGTGAGTGTGGAAGGCTTA |
| CCR10 | GGATACTGCCGATCTACTGGC  | CCAGGAAGGCGTAGAGAACG |
| CXCR3 | ATGCGAGAGAAGCAGCCTTT   | TCCTATAACTGTCCCCGCCA |

Original Images for Blots and Gels:

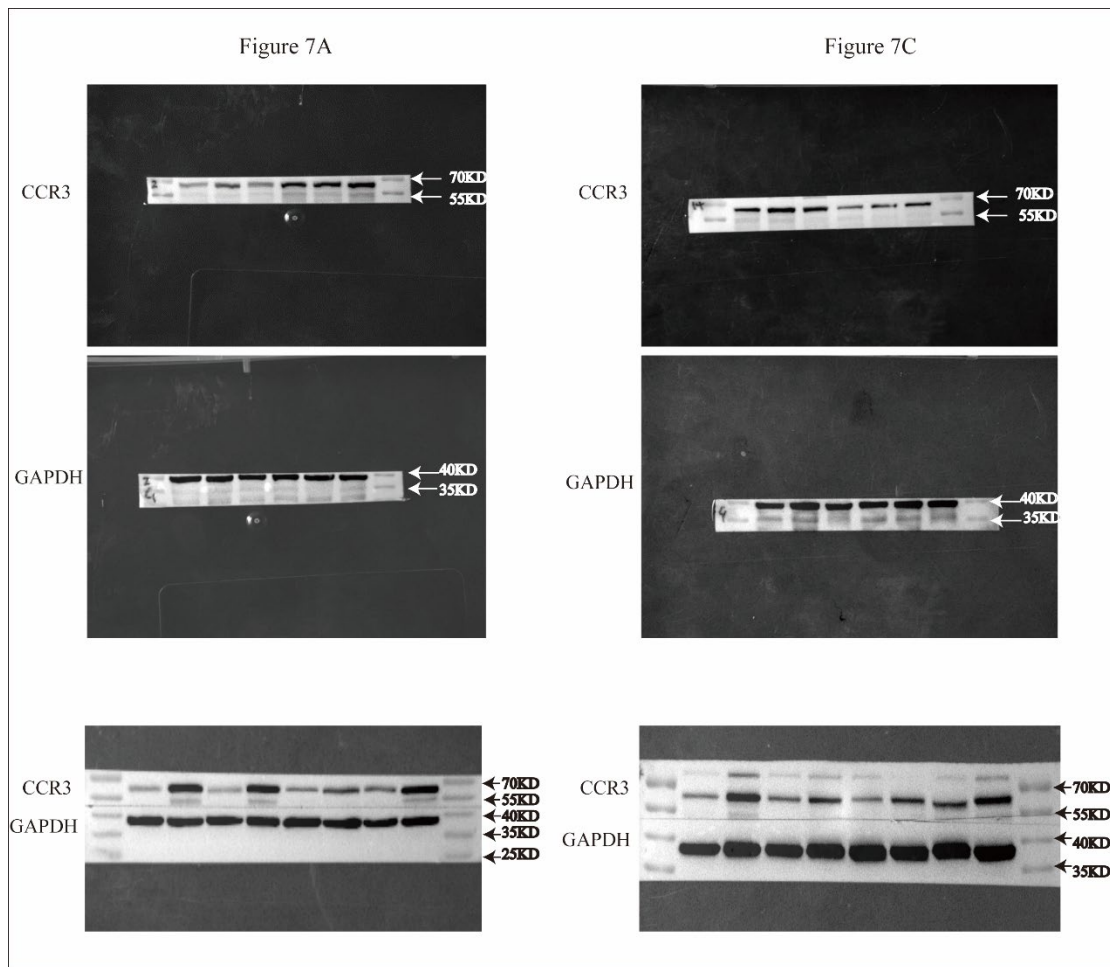

Ladder: Thermo Scientific PageRuler Prestained Protein Ladder. Catalog Number: 26617
